# Supplementary material
Source: PubMed Central journal article supplement (PMC1740943)
Supplement: oenvmed_62_12_895__2.pdf [file oenvmed_62_12_895__2.pdf]

Table 4 PCDD/Fs congener profiles in residents of zone A (near industry) and zone C (away from industry) (% of ng/kg lipid base)

| Congener          | Zone A (%) | Zone C (%) |
|-------------------|------------|------------|
| 2378 Tetra-CDD    | 0.8        | 0.5        |
| 12378 Penta-CDD   | 2.1        | 1.5        |
| 123478 Hexa-CDD   | 1.6        | 1.3        |
| 123678 Hexa-CDD   | 8.3        | 6.2        |
| 123789 Hexa-CDD   | 1.1        | 0.8        |
| 1234678 Hepta-CDD | 3.2        | 3.9        |
| OCDD              | 77.9       | 82.2       |
| 23478 Penta-CDF   | 2.7        | 1.9        |
| 123478 Hexa-CDF   | 1.4        | 1.0        |
| 123678 Hexa-CDF   | 1.0        | 0.7        |

Values of 234678 Hexa CDF and 1234678 Hepta CDF below detection limits for >33% samples, and >90% samples were below detection limit for 2378 Tetra CDF, 12378 Penta CDF, 123789 Hexa CDF, F1234789 Hepta CDF, and OCDF.
