# Supplementary material
Source: PubMed Central journal article supplement (PMC1740943)
Supplement: oenvmed_62_12_895__3.pdf [file oenvmed_62_12_895__3.pdf]

Table 5 TCDD and I-TEQ blood levels in general population samples since 1990 (age 40+ only)

| Reference  | Midpoint sampling year | n  | Mean TCDD<br>ng/kg<br>lipid base | Mean I-TEQ<br>ng/kg<br>lipid base | Population, sample, type                                  | Mean age in<br>years (range) | Country |
|------------|------------------------|----|----------------------------------|-----------------------------------|-----------------------------------------------------------|------------------------------|---------|
| This study | 2002                   | 40 | 4.0                              | 25.0                              | General population near and away<br>from industry, female | 64 (42–79)                   | UK      |
| 26         | 1990                   | 25 | 3.6                              | 42.9                              | Controls for comparative study, male                      | 41                           | Germany |
| 27         | 1997                   | 20 | 1.9                              | 27                                | Residents of Tarragon, male and<br>female                 | 42                           | Spain   |
| 15         | Early<br>1990s         | 3* | ND (3.0)                         | 49.6                              | Non-fish eaters in angler study                           | >50 group                    | Canada  |

---

|    |                  |    |                                  |                               |                                                       |                               |         |
|----|------------------|----|----------------------------------|-------------------------------|-------------------------------------------------------|-------------------------------|---------|
| 28 | 1993             | 18 | SMA: 2.5<br>SMB: 4.4<br>SMC: 4.6 | SMA: 40<br>SMB: 47<br>SMC: 59 | Control workers in sawmill (SM)<br>study              | SMA: 46<br>SMB: 39<br>SMC: 45 | Finland |
| 29 | 1993             | 11 | 1.5                              | 15.7                          | Blood donors, Madrid                                  | 19–55                         | Spain   |
| 13 | 1996             | 44 | 2.8                              | 19.1                          | Controls from range of studies, male<br>and female    | 49 (43–71)                    | Germany |
| 10 | Not<br>specified | 61 | 1.3                              | 10.8                          | Controls Time Beach Missouri<br>incinerator study     | 18–64                         | USA     |
| 12 | Not<br>specified | 19 | 1.3                              | 56–65:<br>20.2                | Controls of incinerator study                         | 18–65                         | Taiwan  |
| 30 | 1991             | 95 | 4.6                              | 42.7                          | General population, sex distribution<br>not specified | 45 (12–82)                    | Germany |
| 31 | 1999             | 46 | 2.4                              | NA                            | Non-Vietnam controls, male                            | 49                            | USA     |

---

|    |      |                |     |                   |                                                                          |            |         |
|----|------|----------------|-----|-------------------|--------------------------------------------------------------------------|------------|---------|
| 32 | 1996 | 400            | 2.3 | 18.7 <sup>5</sup> | Comparison population derived from<br>US based studies in five US States | 45         | USA     |
| 33 | 1992 | 244            | 3.2 | NA                | Ranch Hand study controls, male                                          | 53 (43–76) | USA     |
|    | 1997 | 117            | 2.0 |                   |                                                                          | 58 (47–80) |         |
| 16 | 2000 | 63             | NA  | 24                | Controls of incinerator study                                            | 53         | Belgium |
| 34 | 2001 | 2 <sup>†</sup> | 3.8 | 8.2 <sup>‡</sup>  | Not specified                                                            | >40        | Laos    |

\*Pooled from n=176.

<sup>†</sup>Pooled from n=50 samples.

<sup>‡</sup>WHO-TEQ D/F only.

ND, not detected (detection limit); SMA, SMB, SMC, sawmills A, B, C; NA, not available.
