# Supplementary material
Source: PubMed Central journal article supplement (PMC1740943)

Figure 3 Principal components plot for samples from residents of zones A and C

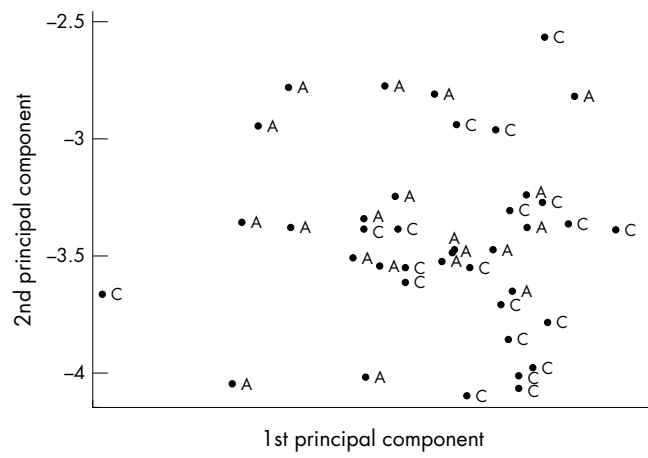

om18754.f3

Supplement: oenvmed_62_12_895__1.pdf [file oenvmed_62_12_895__1.pdf]
